# Supplementary material
Source: PubMed Central journal article supplement (PMC4249172)

1 **Supplementary Materials**

2 *Modifying Protocol for HPLC-MS/MS*

3 The UHPLC-MS/MS used in the assay we described may not be available to all researchers  
4 interested in this method. Tandem mass spectrometers have become widely available at many  
5 research institutions, while UHPLC equipment is less common. Built-in converter software  
6 applications are readily available to convert UHPLC methods to conventional HPLC methods,  
7 and vice versa, with concise instructions provided to the users. Such software and instructions  
8 are routinely available from the LC or MS vendors on request. Further, a literature search will  
9 reveal a number of publications on the topic of migrating UHPLC to HPLC and vice versa, such  
10 as Novakova et al. (2011). We selected UHPLC for the described assay, because it provides  
11 significant reduction in analysis time without loss in peak resolution.

12 **Nováková L, Veuthey JL, Guillarme D.** 2011. Practical method transfer from high  
13 performance liquid chromatography to ultra-high performance liquid chromatography: The  
14 importance of frictional heating. *J Chromatogr A.* **1218:** 7971– 7981

15 **Figure S1:** Chromatograms of each nucleobase showing the elution order of a 1:1:1:1:1 mixture  
16 (1.0 ng each) of commercially supplied (a) cytosine, (b) adenine, (c) guanine, (d) uracil and (e)  
17 thymine. The blue line corresponds to the MRM trace of the  $^{12}\text{C}$  species of each nucleobase,  
18 while red corresponds to the  $\text{MRM}_{\text{C}_{12+1}}$ . The cross-talk of signals from uracil into the cytosine  
19 channel (a, red and green lines) is due to the overlapping  $m/z$  of fragments.

20 **Figure S2:** Quantitation of  $^{13}\text{C}$ -enriched RNA in CsTFA gradient fractions as a proportion of  
21 total RNA recovered (A) and by degree of enrichment (B). N.A. refers to the average % atom  $^{13}\text{C}$   
22 in unlabeled RNA.

**Figure S1**

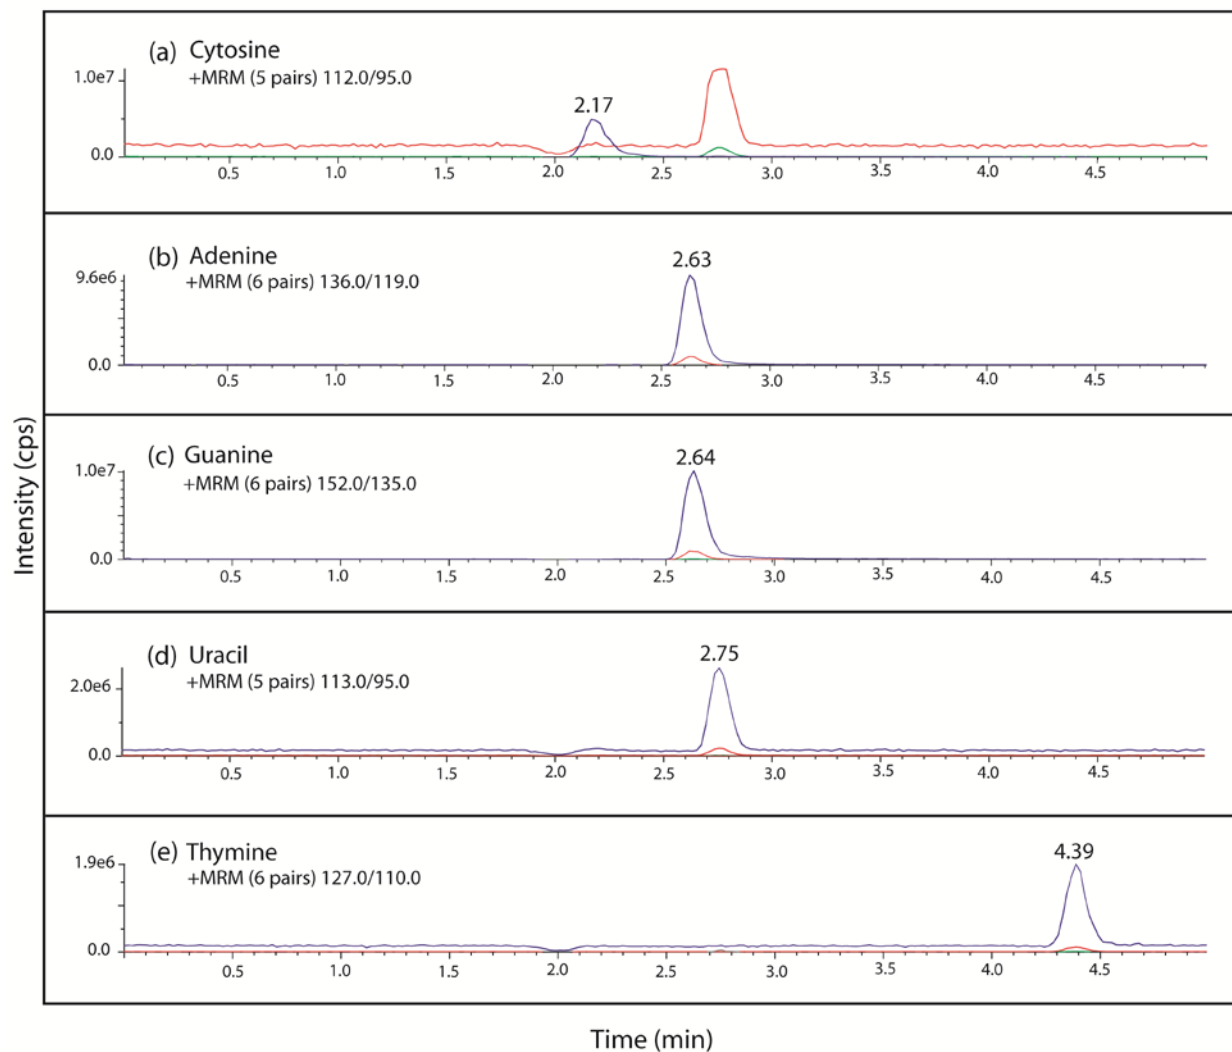

**Figure S2**

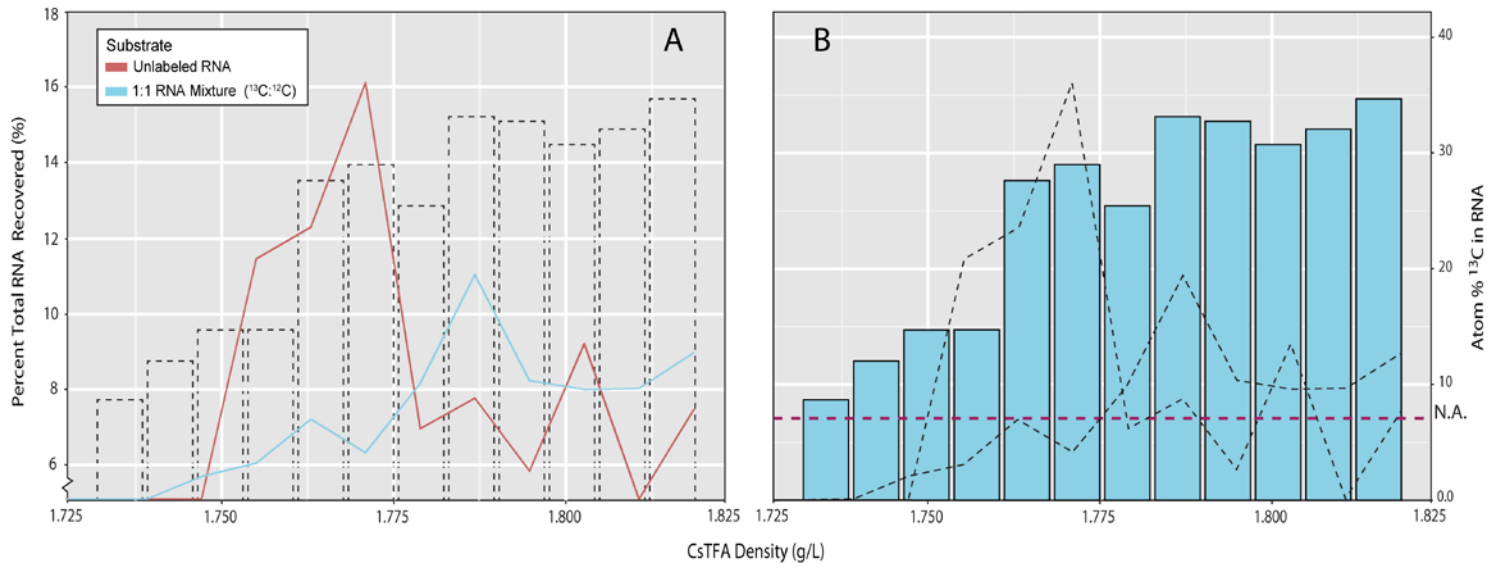

Supplement: AEM.02223-14_zam999105803so1.pdf [file AEM.02223-14_zam999105803so1.pdf]
